# Supplementary material for: Tunable reagents for multi-functional bioconjugation: reversible or permanent chemical modification of proteins and peptides by control of maleimide hydrolysis
Source: PubMed Central journal article supplement — Chem Commun (Camb). 2011 Apr 5;47(19):5452–4. doi: 10.1039/c1cc11114k (PMC3381635; doi:10.1039/c1cc11114k), 2011-04-05
Supplement: CC-047-11114k-s001.pdf [file CC-047-11114k-s001.pdf]

## SUPPORTING INFORMATION

### Tunable Reagents for Multi-functional Bioconjugation: Reversible or Permanent Chemical Modification of Proteins and Peptides by Control of Maleimide Hydrolysis

Chris P. Ryan<sup>a</sup>, Mark E. B. Smith<sup>a</sup>, Felix F. Schumacher<sup>a</sup>, Dina Grohmann<sup>b</sup>, Danai Papaioannou<sup>c</sup>, Finn Werner<sup>b</sup>, Gabriel Waksman<sup>c</sup>, James R. Baker<sup>a\*</sup>, Stephen Caddick<sup>a\*</sup>

*a. Department of Chemistry, UCL, Gordon Street, London, WC1H 0AJ, U.K.; b. Department of Structural and Molecular Biology, UCL, Gower Street, London, WC1E 6BT, U.K.; c. Institute of Structural Molecular Biology at UCL/Birkbeck, Malet Street, London, WC1E 7HX.*

#### 1. General Procedures

<sup>1</sup>H and <sup>13</sup>C NMR spectra were recorded at room temperature on a Bruker Avance 500 instrument operating at a frequency of 500 MHz for <sup>1</sup>H and 125 MHz for <sup>13</sup>C. <sup>1</sup>H NMR spectra were referenced to the CDCl<sub>3</sub> (7.26 ppm) signal. <sup>13</sup>C NMR spectra were referenced to the CDCl<sub>3</sub> (77.67 ppm) signal. Infra-red spectra were run on a PerkinElmer Spectrum 100 FT-IR spectrometer operating in ATR mode with frequencies given in reciprocal centimeters (cm<sup>-1</sup>). Mass spectra and high resolution mass data for small molecules were recorded on a VG70-SE mass spectrometer (EI mode). Melting points were taken on a Gallenkamp heating block and are uncorrected. Lyophilised somatostatin, 3,4-dibromomaleimide, *N*-methylmaleamic acid and *N*-phenylmaleamic acid were purchased from Sigma-Aldrich and used without further purification. *N*-Phenylbromomaleimide<sup>1</sup>, *N*-phenyldibromomaleimide<sup>2</sup>, *N*-methylbromomaleimide<sup>3</sup> and *N*-fluoresceindibromomaleimide<sup>3</sup> were synthesized as described previously.

#### 2. Protein / Peptide Mass Spectrometry

LC-MS was performed on protein samples using a Waters Acquity uPLC connected to Waters Acquity Single Quad Detector (SQD). Column: Acquity uPLC BEH C18 1.7μm 2.1 x 50 mm. Wavelength: 254 nm. Mobile Phase: 95:5 Water (0.1% Formic Acid): MeCN (0.1% Formic Acid) Gradient over 4 min (to 5:95 Water (0.1% Formic Acid): MeCN (0.1% Formic Acid)). Flow Rate: 0.6 mL/min. MS Mode: ES+. Scan Range: m/z = 85-2000. Scan time: 0.25 sec. Data obtained in continuum mode. The electrospray source of the MS was operated with a capillary voltage of 3.5 kV and a cone voltage of 50 V. Nitrogen was used as the nebulizer and desolvation gas at a total flow of 600 L/h. Total mass spectra for protein samples were reconstructed from the ion series using the MaxEnt 1 algorithm pre-installed on MassLynx software.

### 3. Synthesis of Cleavable Affinity Tag 11.

#### *N*-(2-(2-(2-(3-bromo-2,5-dioxo-pyrrol-1-yl)ethoxy)ethoxy)ethyl)-5-(2-oxo-1,3,3a,4,6,6a-hexahydrothieno(3,4-d)imidazol-6-yl)pentanamide 11

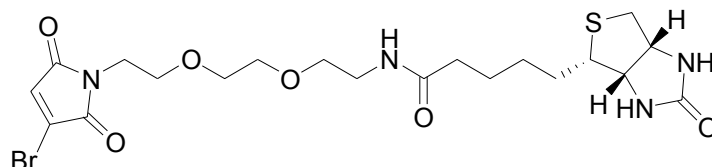

Monobromomaleic anhydride (45.0 mg, 0.25 mmol, 1 eq) was added in one portion to a solution of 2-(2-(2-(5-(2-oxo-1,3,3a,4,6,6a-hexahydrothieno(3,4-d)imidazol-6-yl)pentanoylamino)ethoxy)ethoxy)ethylammonium 2,2,2-trifluoroacetate<sup>4</sup> (124 mg, 0.25 mmol, 1 eq) in acetic acid (10 mL) and the reaction mixture heated to 170 °C for 3 h. Upon cooling to 21 °C toluene was added and the acetic acid azeotropically removed *in vacuo* (x2) to give crude product. Column chromatography (gradient 2-10% MeOH/CH<sub>2</sub>Cl<sub>2</sub>) yielded **11** as a white solid (70.0 mg, 0.13 mmol, 52% yield). m.p. 95-98 °C; [ $\alpha$ ]<sub>D</sub><sup>20.0</sup> +65.1 (*c* 0.15, MeOH); <sup>1</sup>H NMR (600 MHz, CD<sub>3</sub>OD)  $\delta$  7.17 (s, 1H, CHCBr), 4.51 (dd, *J* = 5.0, 8.0 Hz, 1H, NHC(O)NHCH), 4.33 (dd, *J* = 5.0, 8.0 Hz, 1H, NHC(O)NHCH), 3.77 (t, *J* = 5.5 Hz, 2H, OCH<sub>2</sub>), 3.68 (t, *J* = 5.5 Hz, 2H, OCH<sub>2</sub>), 3.63 (m, 2H, OCH<sub>2</sub>), 3.58 (m, 2H, OCH<sub>2</sub>), 3.53 (t, *J* = 5.5 Hz, 2H, NCH<sub>2</sub>), 3.37 (t, *J* = 5.5 Hz, 2H, NCH<sub>2</sub>), 3.24 (td, *J* = 5.0, 8.0 Hz, 1H, SCH), 2.95 (dd, *J* = 5.0, 12.5 Hz, 1H, SCHH), 2.73 (d, *J* = 12.5 Hz, 1H, SCHH), 2.26 (t, *J* = 7.0 Hz, 2H, NHC(O)CH<sub>2</sub>CH<sub>2</sub>CH<sub>2</sub>), 1.69 (m, 4H, CH<sub>2</sub>CH<sub>2</sub>CH<sub>2</sub>), 1.47 (quintet, *J* = 7.0 Hz, 2H, CH<sub>2</sub>CH<sub>2</sub>CH<sub>2</sub>); <sup>13</sup>C NMR (150 MHz, CD<sub>3</sub>OD)  $\delta$  176.12 (s), 170.13 (s), 166.97 (s), 166.08 (s), 133.63 (s), 132.05 (d), 71.22 (t), 71.11 (t), 70.61 (t), 68.69 (t), 63.35 (d), 61.61 (d), 57.03 (d), 41.09 (t), 40.31 (t), 39.09 (t), 36.75 (t), 29.78 (t), 29.50 (t), 26.87 (t); IR (MeOH) 3355, 2970, 1737 cm<sup>-1</sup>; HRMS (ES) calcd for C<sub>20</sub>H<sub>29</sub>N<sub>4</sub>O<sub>6</sub> NaSBr [M+Na]<sup>+</sup> 555.0889, observed 555.0905.

### 4. Protein and Peptide Modification

Sequence of isolated Grb2-SH2 L111C (residues 53-163) **1**: G I E M K P H P W F F G K I P R A K A E E M L S K Q R H D G A F L I R E S E S A P G D F S L S V K F G N D V Q H F K V C R D G A G K Y F L W V V K F N S L N E L V D Y H R S T S V S R N Q Q I F L R D I E Q V P Q Q P T Y V Q A G S R S H H H H H H Stop. Calculated mass = 14168

#### 4.1 Cloning and Expression of Grb2-SH2 L111C Mutant 1

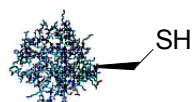

The DNA construct for the Grb2 SH2 domain contained the primary amino acid sequence 53-163 and was cloned on plasmid QE-60 (Qiagen).<sup>5</sup> The Grb2 SH2 L111C mutant was constructed by site-directed mutagenesis (Stratagene Kit) using oligonucleotides coding for the mutated residue. Both constructs were expressed in *Escherichia coli* (M15[pREP4], Qiagen) using a T5 promoter and a C-terminal 6-His

Tag was incorporated to aid purification. Cultures (1 L) were grown at 37 °C in Terrific Broth. from a single colony, and expression was induced with 1.0 mM isopropyl  $\beta$ -D-1-thiogalactopyranoside when an O.D.<sub>600</sub> of 0.9 was attained. Cultures were allowed to express protein for 3 h before the cells were pelleted. Pellets were lysed in 0.1M sodium phosphate, 300 mM NaCl, 50 mM imidazole, pH 7.2 containing a protease inhibitor cocktail (Roche). The lysate was centrifuged, and the supernatant was applied to a Ni-NTA column (Qiagen). Grb2-SH2 L111C was eluted from the Ni-NTA column with 0.1M sodium phosphate, 300 mM NaCl, 200 mM imidazole at pH 7.2 . The collected Grb2 SH2 L111C **1** was ~95% pure as visualized by Coomassie-stained SDS-PAGE. Dimerization of Grb2 SH2 domain through domain-swapping has been previously observed.<sup>6</sup> Dimeric and monomeric Grb2-SH2 were separated on a Sephacryl S-100 column (320 mL) that had been pre-equilibrated with 0.1 M sodium phosphate and 150 mM NaCl at pH 8.0. Two peaks eluted, corresponding to the molecular weights of monomer (~14 kDa) and dimer (~28 kDa) Grb2-SH2. Almost, 60% of the Grb2-SH2 L111C domain **1** eluted from the column as monomer. Separated monomer and dimer were found to be surprisingly kinetically stable, as very little interconversion was seen over a course of months at 4 °C. The monomer was concentrated using Amicon® Ultra-4 centrifugal filter units (Millipore) and the final concentration of the protein was determined by absorbance at 280nm using the extinction coefficient obtained by McNemar and coworkers (15,600M<sup>-1</sup>).<sup>7</sup> The protein was frozen at 2 mg/mL concentration in 100  $\mu$ L aliquots which were thawed as required for experiments. The mass of the monomeric protein **1** (mass = 14177) was obtained using LC-MS

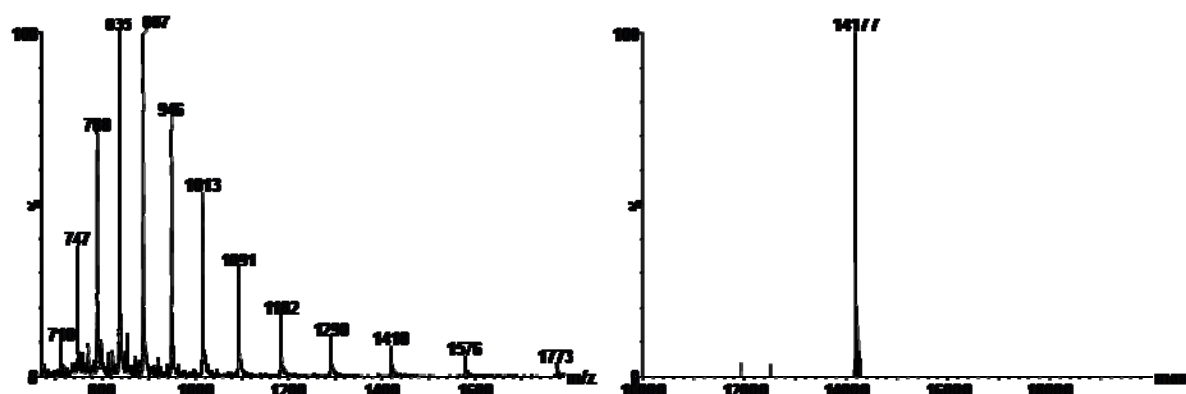

#### 4.2 Grb2-SH2 L111C Mutant / Ellman's Reagent Adduct

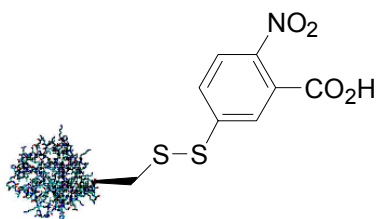

To a solution of Grb2-SH2 (L111C) **1** (100  $\mu$ L, [Protein] 2.0 mg/mL, 100 mM sodium phosphate, 150 mM NaCl, pH 8.0) at 0°C was added Ellman's reagent (5  $\mu$ L, 282 mM solution in H<sub>2</sub>O) at 0°C. The mixture was vortexed for 1 s and maintained at 0°C for 10 mins after which the mixture was analysed by LC-MS. Analysis showed that a single reaction had occurred yielding a single product with a mass of 14374 showing that C111 was available for functionalisation

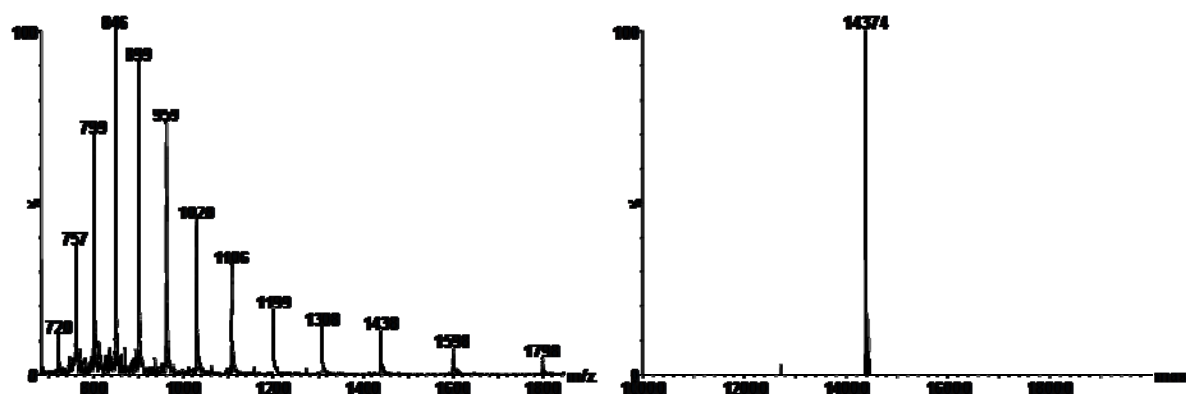

#### 4.3 Reaction of Grb2-SH2 Domain L111C with *N*-Methylmaleamic Acid

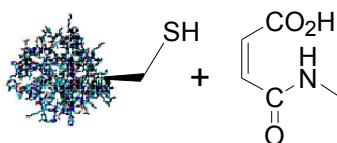

To a solution of model protein **1** (100  $\mu$ L, [Protein] 2.0 mg/mL, 100 mM sodium phosphate, 150 mM NaCl, pH 8.0) at 0°C was added *N*-methylmaleamic acid (5  $\mu$ L, 2.82 mM solution in DMF). The mixture was vortexed for 1 s then maintained at 0°C for 2 h. Analysis using LC-MS showed that no reaction had occurred. Heating the reaction at 37°C for a further 2 h also yielded no conversion.

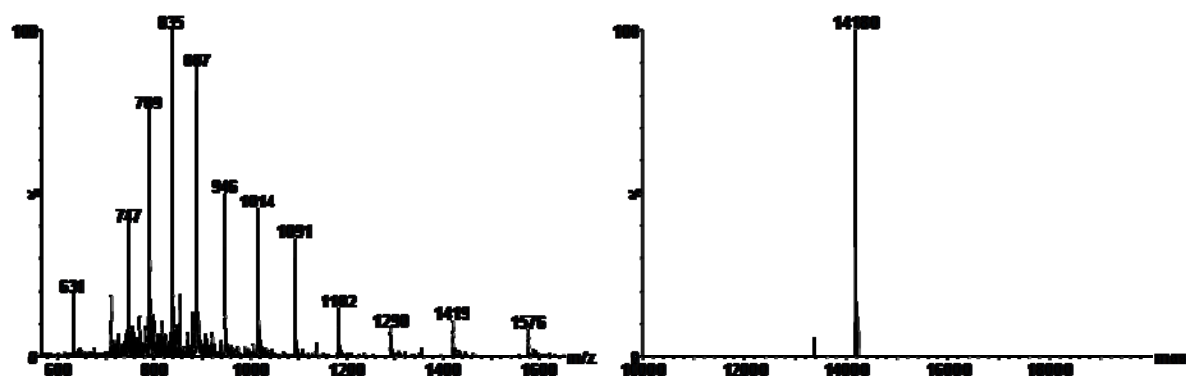

#### 4.4 Reaction of Grb2-SH2 Domain L111C with *N*-Phenylmaleamic Acid

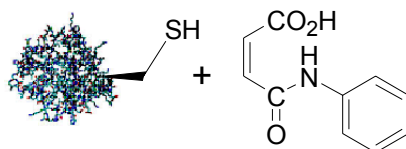

To a solution of model protein **1** (100  $\mu$ L, [Protein] 2.0 mg/mL, 100 mM sodium phosphate, 150 mM NaCl, pH 8.0) at 0°C was added *N*-phenylmaleamic acid (5  $\mu$ L, 2.82 mM solution in DMF). The mixture was vortexed for 1 s then maintained at 0°C for 2 h. Analysis using LC-MS showed that no reaction had occurred. Heating the reaction at 37°C for a further 2 h also yielded no conversion.

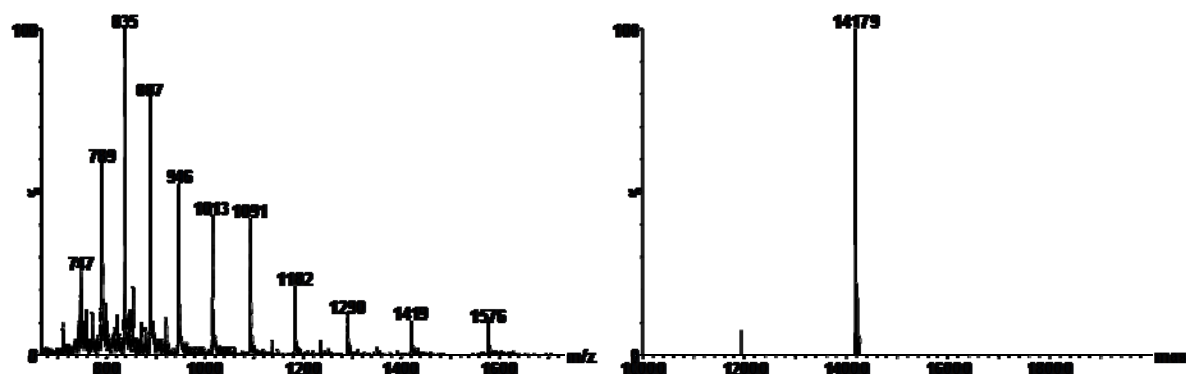

#### 4.5 Grb2-SH2 Domain L111C / *N*-Methylbromomaleimide Adduct

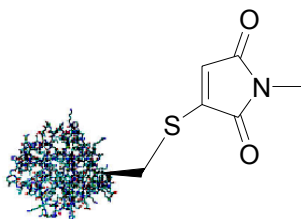

To a solution of model protein **1** (100  $\mu$ L, [Protein] 2.0 mg/mL, 100 mM sodium phosphate, 150 mM NaCl, pH 8.0) at 0°C was added *N*-methylbromomaleimide (5  $\mu$ L, 2.82 mM solution in DMF). The mixture was vortexed for 1 s then maintained at 0°C for 1 h. Analysis using LC-MS showed that the desired product had been formed in quantitative conversion (mass = 14288)<sup>3</sup>.

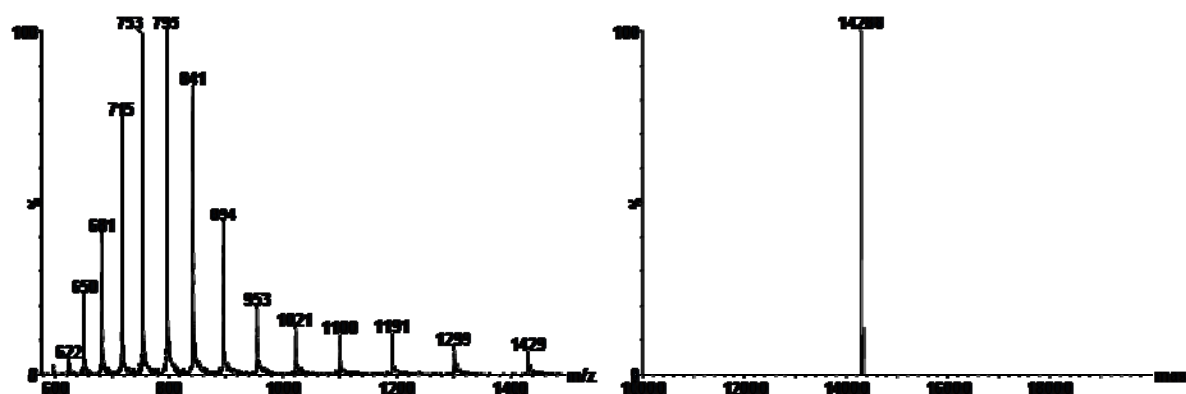

The solution of Grb2-SH2 domain L111C / *N*-methylbromomaleimide adduct was heated at 37°C for 4 h. The construct was stable to hydrolysis under these conditions (mass = 14289).

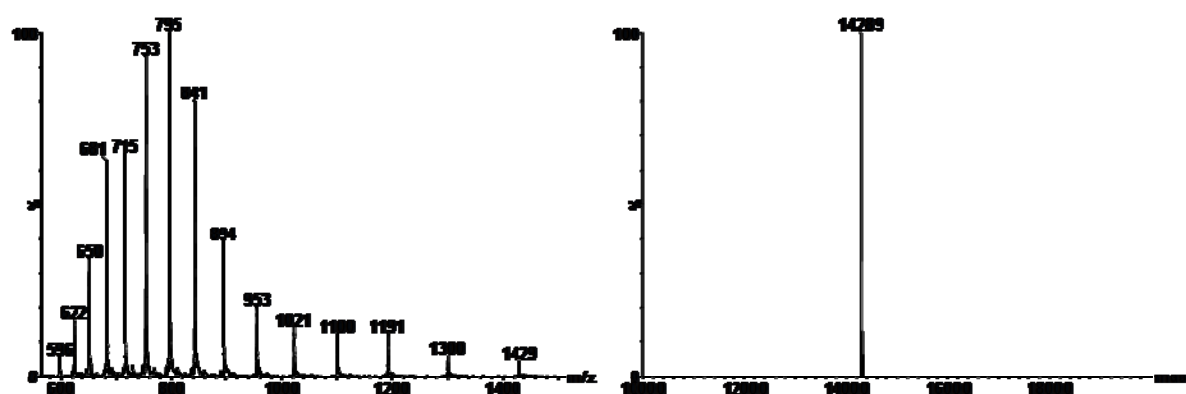

#### 4.6 Grb2-SH2 Domain L111C / *N*-Phenylbromomaleimide Adduct 3

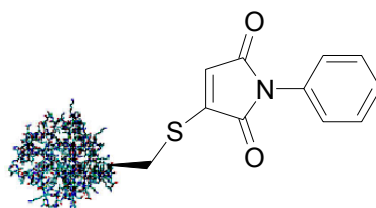

To a solution of model protein **1** (100  $\mu$ L, [Protein] 2.0 mg/mL, 100 mM sodium phosphate, 150 mM NaCl, pH 8.0) at 0°C was added *N*-phenylbromomaleimide **2** (5  $\mu$ L, 2.82 mM solution in DMF). The mixture was vortexed for 1 s then maintained at 0°C for 1 h. Analysis using LC-MS showed that the desired product **3** had been formed in quantitative conversion (mass = 14351).

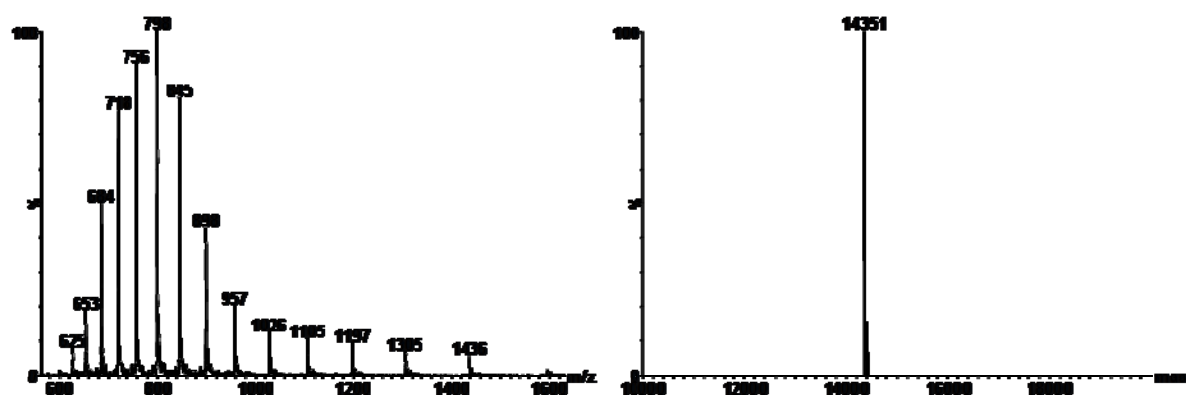

The mixture was treated with Ellman's reagent (5  $\mu$ L, 282 mM solution in H<sub>2</sub>O) at 0°C. The mixture was vortexed for 1 s and maintained at 0°C for 10 mins after which the mixture was analysed by LC-MS. Analysis showed that no reaction with Ellman's reagent was evident highlighting that *N*-phenylbromomaleimide functionalisation had occurred at C111.

#### 4.7 Hydrolysed Grb2-SH2 Domain L111C / *N*-Phenylbromomaleimide Adduct 4

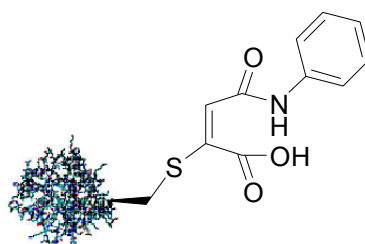

To a solution of model protein **1** (100  $\mu$ L, [Protein] 2.0 mg/mL, 100 mM sodium phosphate, 150 mM NaCl, pH 8.0) at 0°C was added *N*-phenylbromomaleimide **2** (5  $\mu$ L, 2.82 mM solution in DMF). The mixture was vortexed for 1 s then maintained at 0°C for 1 h. Analysis using LC-MS showed that protein / *N*-phenylbromomaleimide adduct **3** had been formed (mass = 14351).

Heating of the mixture at 37°C for 4 h gave the desired product **4** in quantitative conversion (mass = 14369).

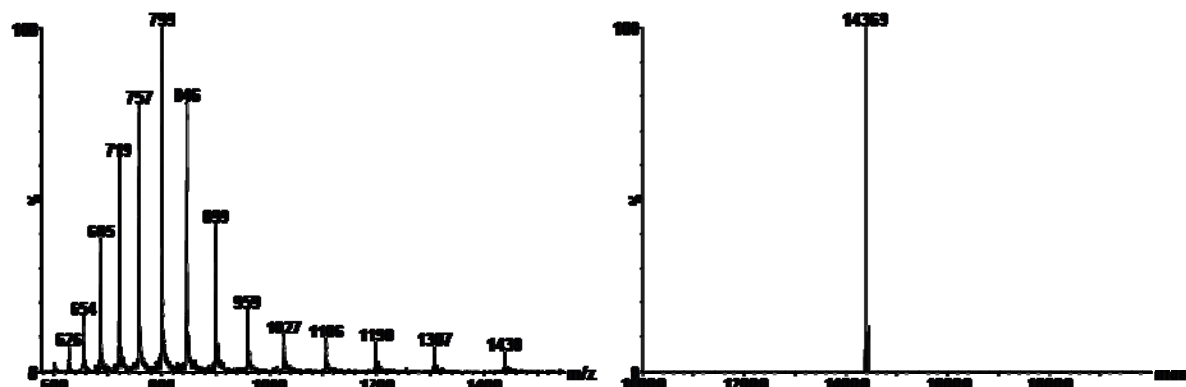

#### 4.8 Treatment of Hydrolysed Grb2-SH2 Domain L111C / *N*-Phenylbromomaleimide Adduct **4** with excess 2-Mercaptoethanol

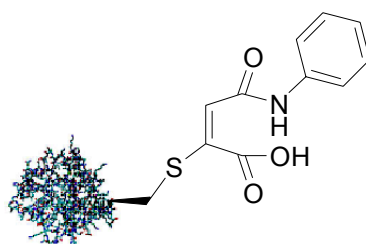

To a solution of model protein **1** (100  $\mu$ L, [Protein] 2.0 mg/mL, 100 mM sodium phosphate, 150 mM NaCl, pH 8.0) at 0°C was added *N*-phenylbromomaleimide **2** (5  $\mu$ L, 2.82 mM solution in DMF). The mixture was vortexed for 1 s then maintained at 0°C for 1 h. Analysis using LC-MS showed that protein / *N*-phenylbromomaleimide adduct **3** had been formed (mass = 14351).

Heating of the mixture at 37°C for 4 h gave the desired product **4** (mass = 14369).

The mixture was treated with 2-mercaptoethanol (5  $\mu$ L, 282 mM solution in H<sub>2</sub>O), vortexed for 1 s and maintained at 37°C for 4 h after which the mixture was analysed by LC-MS. Analysis showed that hydrolysed protein / *N*-phenylbromomaleimide adduct **4** was stable to these conditions.

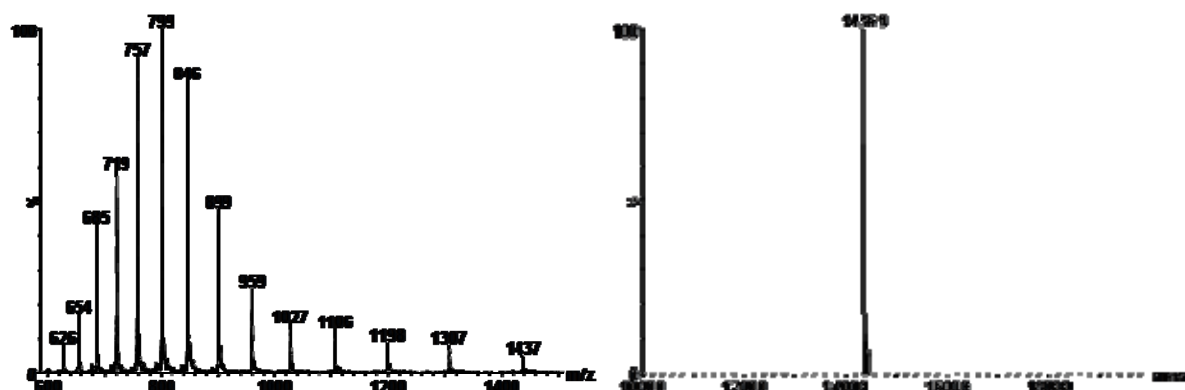

#### 4.9 Grb2-SH2 Domain L111C / *N*-Phenyldibromomaleimide Adduct 6 at pH 8

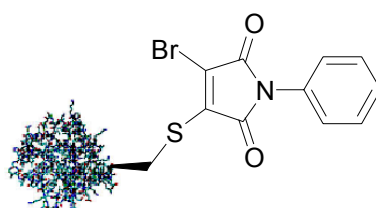

To a solution of model protein **1** (100  $\mu$ L, [Protein] 2.0 mg/mL, 100 mM sodium phosphate, 150 mM NaCl, pH 8.0) at 0°C was added *N*-phenyldibromomaleimide **5** (5  $\mu$ L, 2.82 mM solution in DMF). The mixture was vortexed for 1 s then maintained at 0°C for 2 h. Analysis using LC-MS showed that a mixture of the expected product **6** (mass = 14427) and its hydrolysed derivative **7** (mass = 14445) had been formed in a 7:3 ratio.

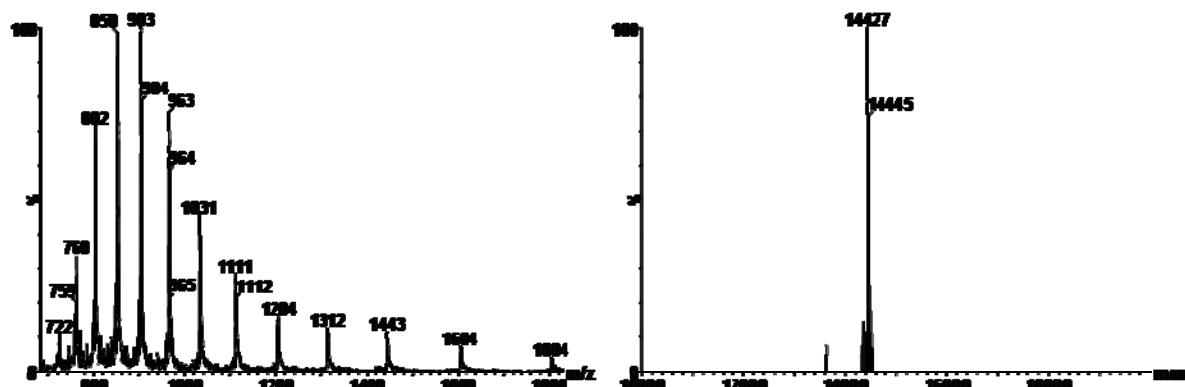

#### 4.10 Grb2-SH2 Domain L111C / *N*-Phenyldibromomaleimide Adduct 6 at pH 6

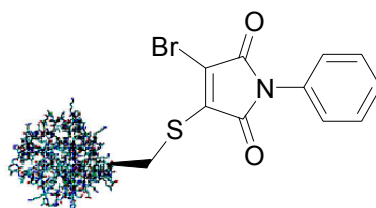

To a solution of model protein **1** (100  $\mu$ L, [Protein] 2.0 mg/mL, 20 mM MES, 150 mM NaCl, pH 6) at 0°C was added *N*-phenyldibromomaleimide **5** (5  $\mu$ L, 2.82 mM solution in DMF). The mixture was vortexed for 1 s then maintained at 0°C for 2 h. Analysis using LC-MS showed that the desired product **6** had been formed in >95% conversion (mass = 14427).

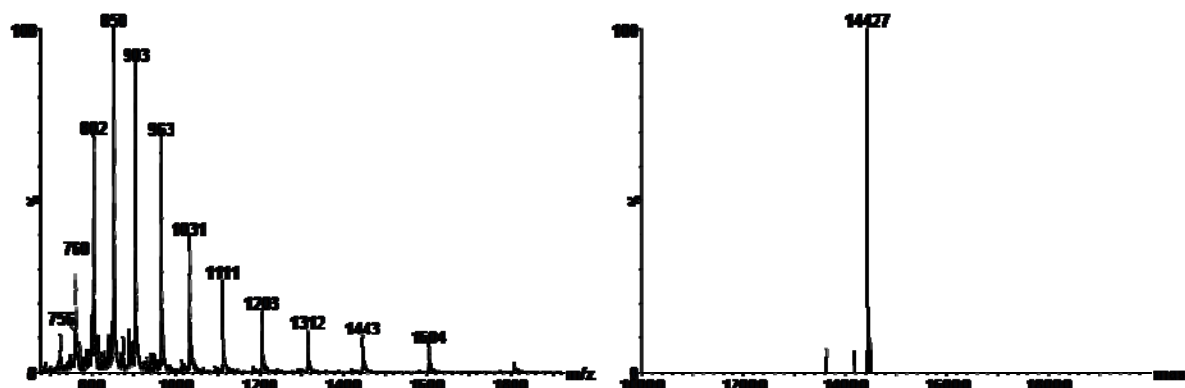

The mixture was treated with Ellman's reagent (5  $\mu$ L, 282 mM solution in H<sub>2</sub>O) at 0°C. The mixture was vortexed for 1 s and maintained at 0°C for 10 mins after which the mixture was analysed by LC-MS. Analysis showed that no reaction with Ellman's reagent was evident highlighting that *N*-phenyldibromomaleimide functionalisation had occurred at C111.

#### 4.11 Grb2-SH2 Domain L111C / *N*-Phenyldibromomaleimide / $\beta$ -1-Thioglucose Adduct **9**

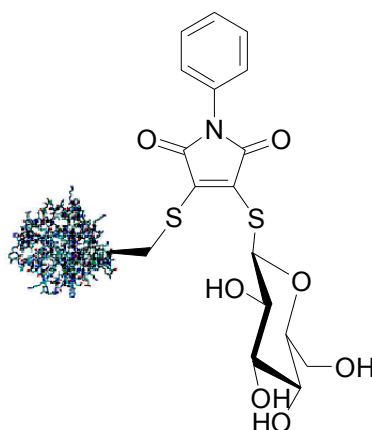

To a solution of model protein **1** (100  $\mu$ L, [Protein] 2.0 mg/mL, 20 mM MES, 150 mM NaCl, pH 6) at 0°C was added *N*-phenyldibromomaleimide **5** (5  $\mu$ L, 2.82 mM solution in DMF). The mixture was vortexed for 1 s then maintained at 0°C for 2 h. Analysis using LC-MS showed that protein / *N*-phenyldibromomaleimide adduct **6** had been formed (mass = 14427).

The mixture was treated with  $\beta$ -1-thioglucose, sodium salt **8** (5  $\mu$ L, 2.82 mM solution in H<sub>2</sub>O) at 0°C. The mixture was vortexed for 1 s and maintained at 0°C for 1 h after which the mixture was analysed by LC-MS. Analysis showed that the desired product **9** (mass = 14542) was formed in >90% conversion.

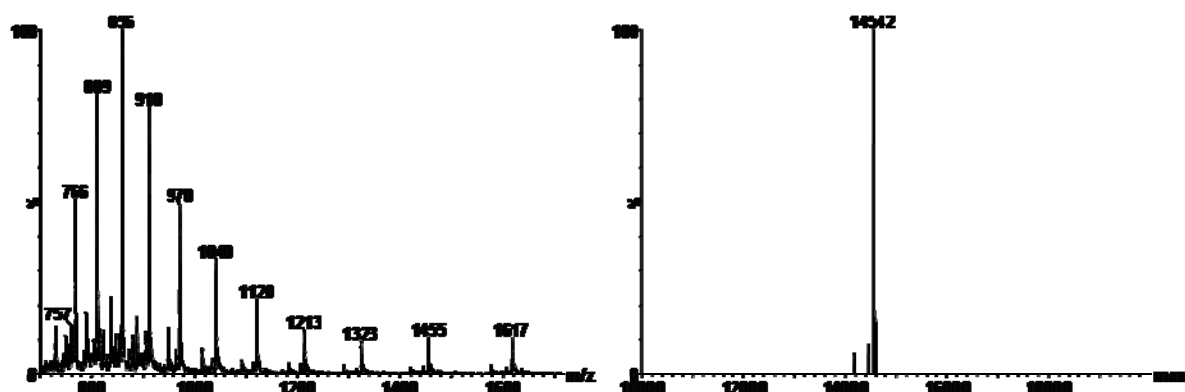

#### 4.12 2-Mercaptoethanol-mediated Cleavage of Grb2-SH2 Domain L111C / *N*-Phenyldibromomaleimide / $\beta$ -1-Thioglucose Adduct **9** to yield Protein **1**

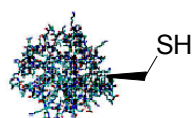

To a solution of model protein **1** (100  $\mu$ L, [Protein] 2.0 mg/mL, 20 mM MES, 150 mM NaCl, pH 6) at 0°C was added *N*-phenyldibromomaleimide **5** (5  $\mu$ L, 2.82 mM solution in DMF). The mixture was vortexed for 1 s then maintained at 0°C for 2 h. Analysis using LC-MS showed that protein / *N*-phenyldibromomaleimide adduct **6** had been formed (mass = 14427).

The mixture was treated with  $\beta$ -1-thioglucose, sodium salt **8** (5  $\mu$ L, 2.82 mM solution in H<sub>2</sub>O) at 0°C. The mixture was vortexed for 1 s and maintained at 0°C for 1 h after which the mixture was analysed by LC-MS. Analysis showed that the desired product **9** (mass = 14542) was formed.

The mixture was treated with 2-mercaptoethanol (5  $\mu$ L, 282 mM solution in H<sub>2</sub>O) at 0°C. The mixture was vortexed for 1 s and maintained at 0°C for 2 h after which the mixture was analysed by LC-MS. Analysis showed that the protein / *N*-phenyldibromomaleimide /  $\beta$ -1-thioglucose **9** had been cleanly cleaved yielding the Grb2-SH2 (L111C) **1** (mass = 14177) in quantitative conversion.

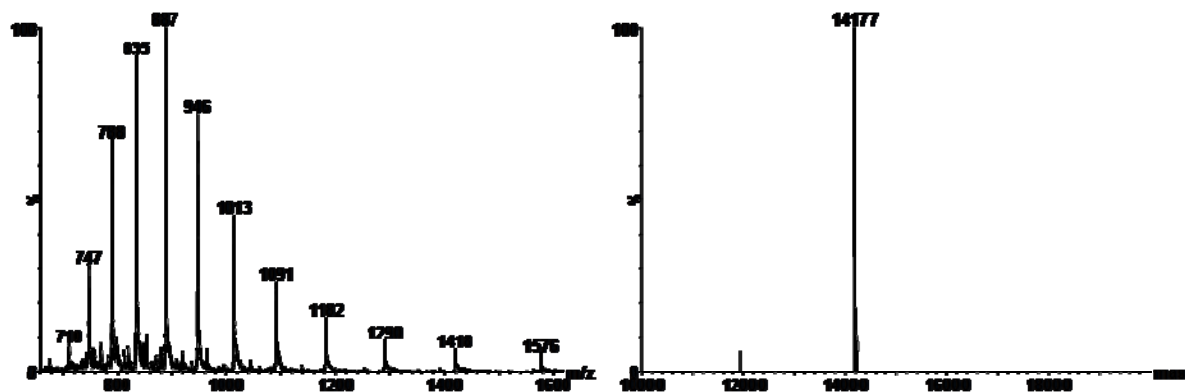

#### 4.13 Hydrolysed Grb2-SH2 Domain L111C / *N*-Phenyldibromomaleimide / $\beta$ -1-Thioglucose Adduct **10**

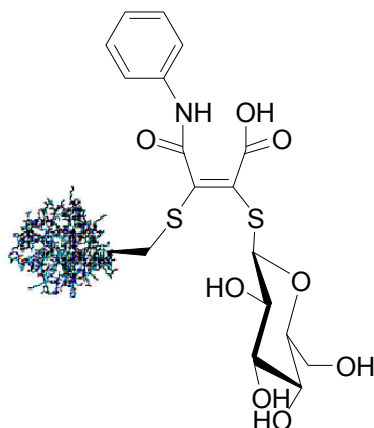

To a solution of model protein **1** (100  $\mu$ L, [Protein] 2.0 mg/mL, 20 mM MES, 150 mM NaCl, pH 6) at 0°C was added *N*-phenyldibromomaleimide **5** (5  $\mu$ L, 2.82 mM solution in DMF). The mixture was vortexed for 1 s then maintained at 0°C for 2 h. Analysis using LC-MS showed that protein / *N*-phenyldibromomaleimide adduct **6** had been formed (mass = 14427).

The mixture was treated with  $\beta$ -1-thioglucose, sodium salt **8** (5  $\mu$ L, 2.82 mM solution in H<sub>2</sub>O) at 0°C. The mixture was vortexed for 1 s and maintained at 0°C for 2 h after which the mixture was analysed by LC-MS. Analysis showed that the protein / *N*-phenyldibromomaleimide /  $\beta$ -1-thioglucose **9** (mass = 14542) was formed.

Dialysis (100 mM sodium phosphate, 150 mM NaCl, pH 8.0, 1L) (Slide-A-Lyzer<sup>®</sup>, 10,000 MWCO, Thermo Scientific) for 12 h at 4°C gave the desired product **10** in >95% conversion (mass = 14560).

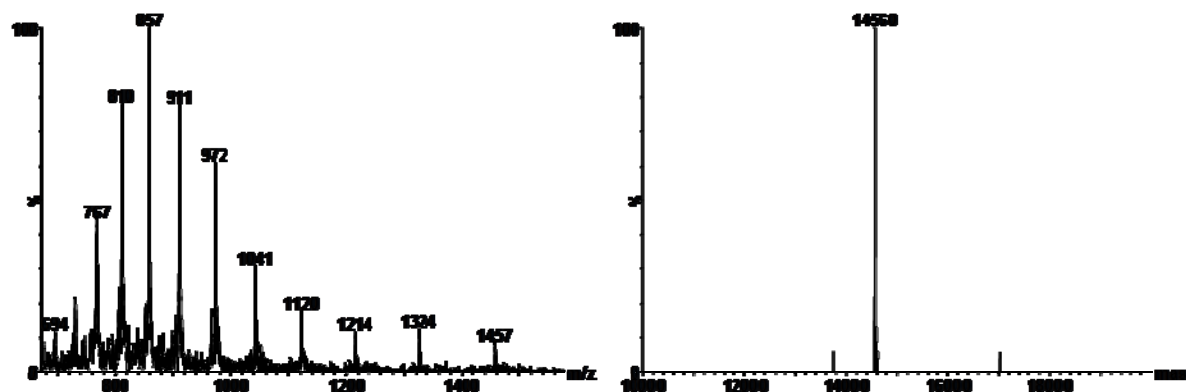

#### 4.14 Treatment of Hydrolysed Grb2-SH2 Domain L111C / *N*-Phenyldibromomaleimide / $\beta$ -1-Thioglucose Adduct **10** with an Excess of 2-Mercaptoethanol

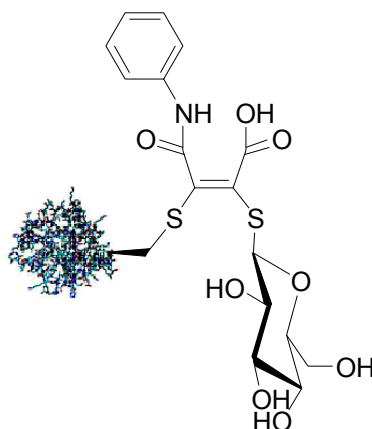

To a solution of model protein **1** (100  $\mu$ L, [Protein] 2.0 mg/mL, 20 mM MES, 150 mM NaCl, pH 6) at 0°C was added *N*-phenyldibromomaleimide **5** (5  $\mu$ L, 2.82 mM solution in DMF). The mixture was vortexed for 1 s then maintained at 0°C for 2 h. Analysis using LC-MS showed that protein / *N*-phenyldibromomaleimide adduct **6** had been formed (mass = 14427).

The mixture was treated with  $\beta$ -1-thioglucose, sodium salt **8** (5  $\mu$ L, 2.82 mM solution in H<sub>2</sub>O) at 0°C. The mixture was vortexed for 1 s and maintained at 0°C for 2 h after which the mixture was analysed by LC-MS. Analysis showed that the protein / *N*-phenyldibromomaleimide /  $\beta$ -1-thioglucose **9** ( mass = 14542) was formed.

Dialysis (100 mM sodium phosphate, 150 mM NaCl, pH 8.0, 1L) (Slide-A-Lyzer<sup>®</sup>, 10,000 MWCO, Thermo Scientific) for 12 h at 4°C gave product **10** (mass = 14560).

The mixture was treated with 2-mercaptoethanol (5  $\mu$ L, 282 mM solution in H<sub>2</sub>O), vortexed for 1 s and maintained at 37°C for 4 h after which the mixture was analysed by LC-MS. Analysis showed that hydrolysed protein / *N*-phenyldibromomaleimide /  $\beta$ -1-thioglucose **10** adduct was stable to these conditions.

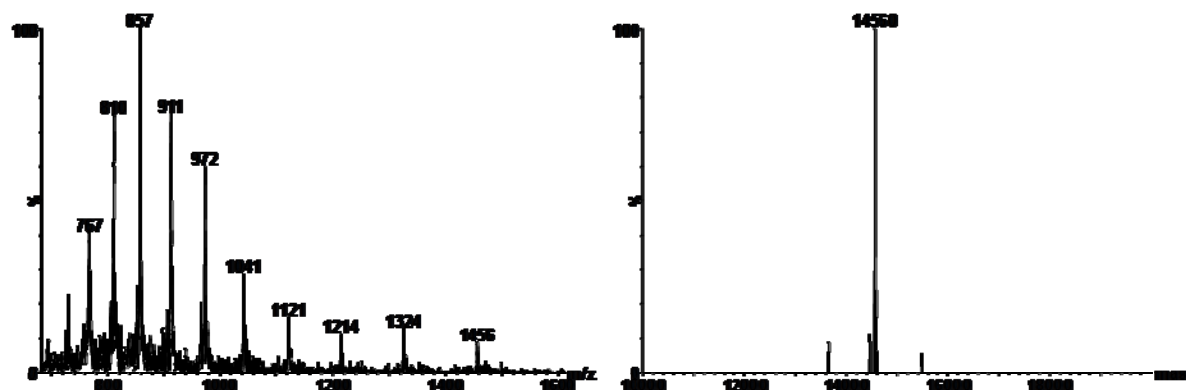

#### 4.15 Grb2-SH2 Domain L111C / Biotin-PEG-bromomaleimide Adduct 12

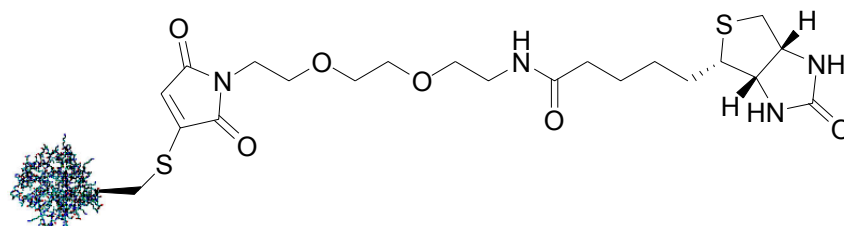

To a solution of model protein **1** (100  $\mu$ L, [Protein] 2.0 mg/mL, 100 mM sodium phosphate, 150 mM NaCl, pH 8.0) at 0°C was added biotin-PEG-bromomaleimide **11** (5  $\mu$ L, 2.82 mM solution in DMF). The mixture was vortexed for 1 s then maintained at 0°C for 1 h. Analysis using LC-MS showed that the desired product **12** had been formed in quantitative conversion (mass = 14630).

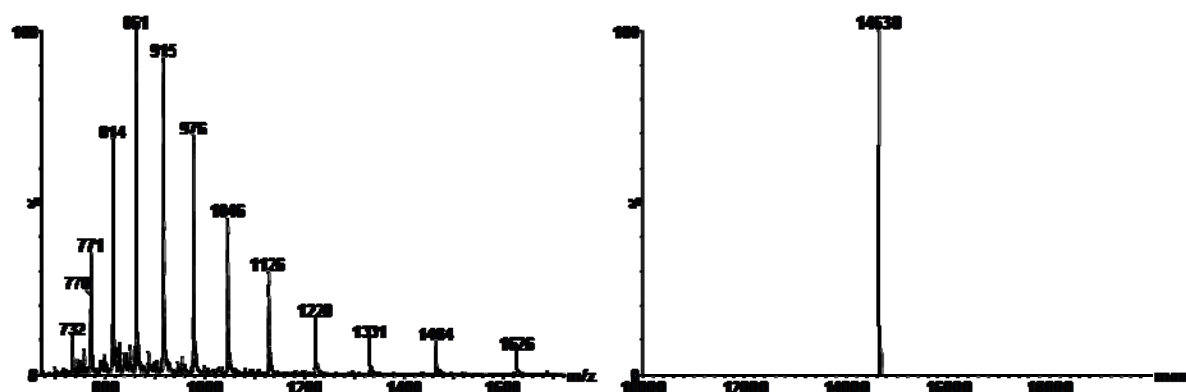

The mixture was treated with Ellman's reagent (5  $\mu$ L, 282 mM solution in H<sub>2</sub>O) at 0°C. The mixture was vortexed for 1 s and maintained at 0°C for 10 mins after which the mixture was analysed by LC-MS. Analysis showed that no reaction with Ellman's reagent was evident highlighting that biotinylation had occurred at C111.

#### 4.16 2-Mercaptoethanol-mediated Cleavage of Grb2-SH2 Domain L111C / Biotin-PEG-bromomaleimide Adduct 12 to Yield Protein 1

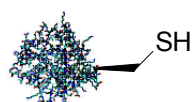

To a solution of model protein **1** (100  $\mu$ L, [Protein] 2.0 mg/mL, 100 mM sodium phosphate, 150 mM NaCl, pH 8.0) at 0°C was added biotin-PEG-bromomaleimide **11** (5  $\mu$ L, 2.82 mM solution in DMF). The mixture was vortexed for 1 s then maintained at 0°C for 1 h. Analysis using LC-MS showed that the protein / biotin-PEG-bromomaleimide adduct **12** had been formed (mass = 14630).

The mixture was treated with 2-mercaptoethanol (5  $\mu$ L, 282 mM solution in H<sub>2</sub>O), vortexed for 1 s and maintained at 37°C for 4 h after which the mixture was analysed

by LC-MS. Analysis showed that desired product **1** was formed in quantitative conversion (mass = 14177).

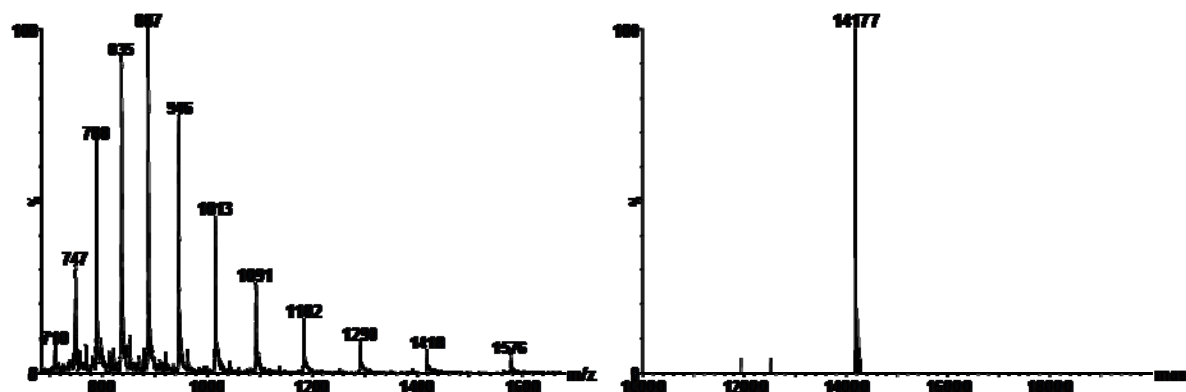

#### 4.17 Pull-Down and Release of Grb2-SH2 Domain L111C / Biotin-PEG-bromomaleimide Adduct onto Neutravidin Coated Agarose Beads

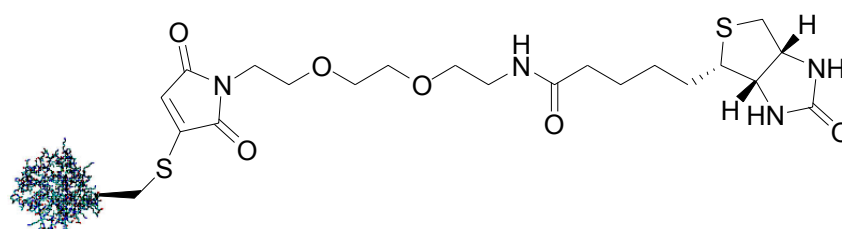

To a solution of model protein **1** (200  $\mu$ L, [Protein] 1.0 mg/mL, 100 mM sodium phosphate, 150 mM NaCl, pH 8.0) at 0°C was added biotin-PEG-bromomaleimide **11** (10  $\mu$ L, 2.82 mM solution in DMF). The mixture was vortexed for 1 s then maintained at 0°C for 1 h. Analysis using LC-MS showed that the desired product **12** had been formed (mass = 14630).

Protein / biotin-PEG-bromomaleimide adduct **12** (200  $\mu$ L) and unmodified model protein **1** (200  $\mu$ L) were washed independently with PBS buffer (3 x 500  $\mu$ L), to remove any excess reagent **11**, in a concentrator (Vivaspin, cut off 10k) yielding protein solutions (300  $\mu$ L) (Input fraction, **In**). For each of the protein solutions obtained, neutravidin-coated agarose beads (Pierce) (750  $\mu$ L of 50% aqueous slurry) were washed with PBS (2 x 500  $\mu$ L). Protein solution (300  $\mu$ L) was then added to the beads and the mixture incubated at 4°C for 30 mins. The mixture was centrifuged and the flow through (**FT**) collected. The beads were washed with PBS (2 x 500  $\mu$ L) and both wash fractions collected (**W1** and **W2**). Protein was released from the beads by incubation in PBS (300  $\mu$ L) containing 2-mercaptoethanol (25 mM) for 2 h at 37°C. The sample was centrifuged and the eluant (**EI**) containing cleaved Grb2-SH2 domain L111C collected.

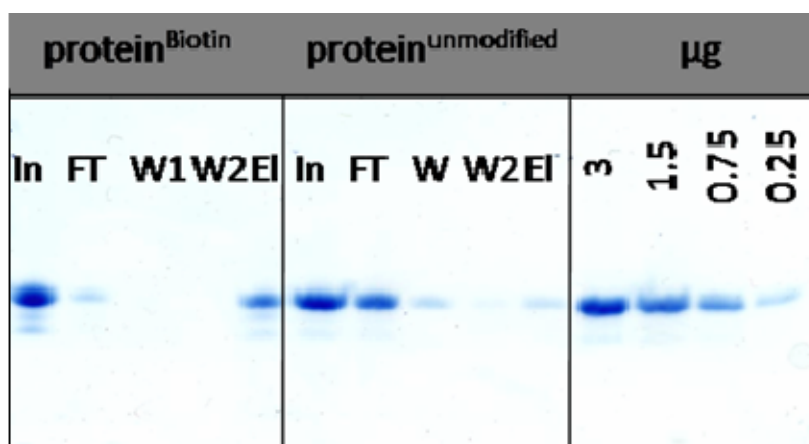

|    | <i>Biotinylated</i>                      | <i>w/o Biotin</i> |
|----|------------------------------------------|-------------------|
|    | total protein per band ( $\mu\text{g}$ ) |                   |
| IN | 1.68                                     | 1.83              |
| FT | 0.06                                     | 1.07              |
| W1 |                                          | 0.08              |
| W2 |                                          |                   |
| EL | 0.75                                     | 0.06              |

The amount of protein recovered was determined as 46% by comparison with a protein series dilution on a SDS-PAGE gel *via* densitometry. However, correcting for non-specific, irreversibly bound protein (determined using the unmodified protein control) the corrected recovery was 77%.

#### 4.18 Hydrolysed Somatostatin / *N*-Fluoresceindibromomaleimide Adduct 14

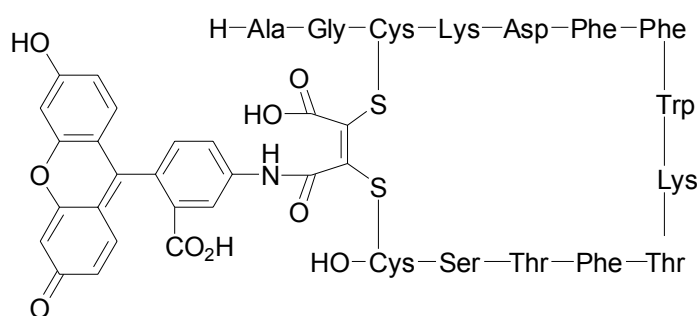

Lyophilised somatostatin (Sigma-Aldrich) was solubilised in buffer (50 mM sodium phosphate, pH 6.2, 40 % ACN, 2.5 % DMF) to yield a concentration of 152.6  $\mu\text{M}$  (0.25 mg/ml) and reduced with TCEP (1.1 eq) for 1 h at ambient temperature. After the completeness of the reduction had been confirmed by LC-MS ( $M^{+2} = 820$ ), *N*-fluorescein- dibromomaleimide (1.1 eq) was added for 10 min at room temperature and quantitative insertion of the maleimide into the opened disulfide bond to give **13** was confirmed by LC-MS ( $M^{+2} = 1033$ ).<sup>3</sup>

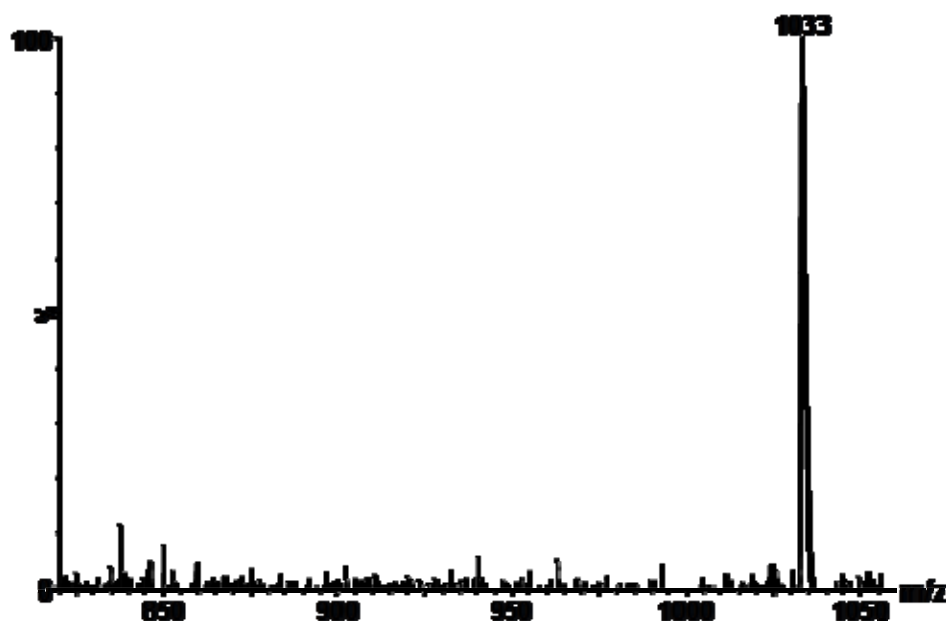

The solution of conjugate **13** was dialysed (sodium phosphate, 50 mM, pH 8) (Slide-A-Lyzer<sup>®</sup>, 2,000 MWCO, Thermo Scientific) for 12 h at 4°C and subsequently heated at 37°C for 24 h. Analysis by LC-MS showed that the desired conjugate **14** had been formed in quantitative conversion ( $M^{+2} = 1042$ ).

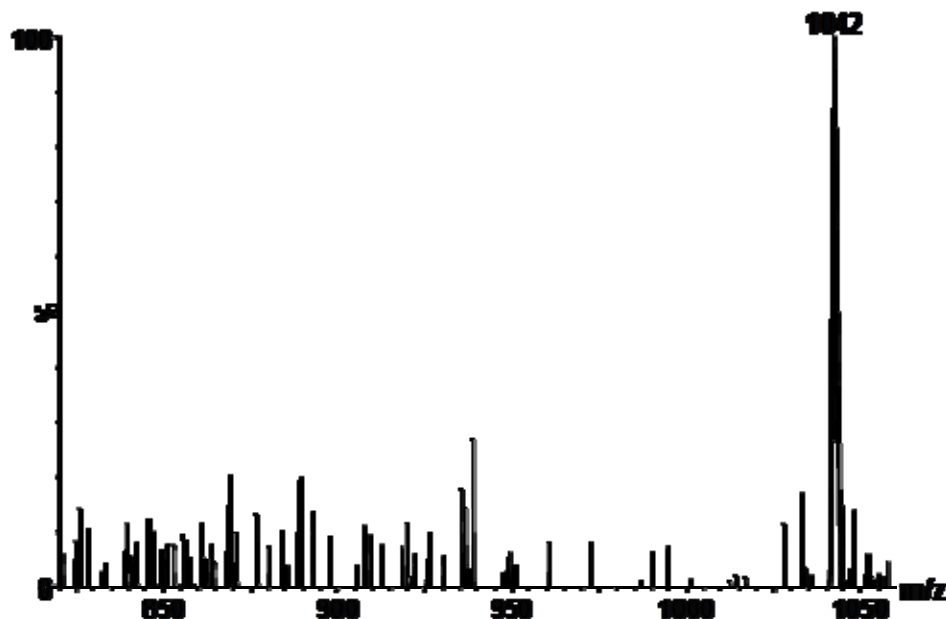

#### 4.19 Treatment of Hydrolysed Somatostatin / *N*-Fluoresceindibromomaleimide Adduct **14** with an Excess of 2-Mercaptoethanol

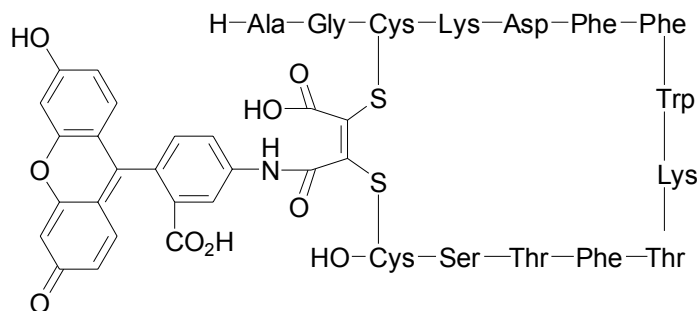

Lyophilised somatostatin (Sigma-Aldrich) was solubilised in buffer (50 mM sodium phosphate, pH 6.2, 40 % ACN, 2.5 % DMF) to yield a concentration of 152.6  $\mu\text{M}$  (0.25 mg/ml) and reduced with TCEP (1.1 eq) for 1 h at ambient temperature. After the completeness of the reduction had been confirmed by LC-MS ( $M^{+2} = 820$ ), *N*-fluorescein- dibromomaleimide (1.1 eq) was added for 10 min at room temperature and quantitative insertion of the maleimide into the opened disulfide bond to give **13** was confirmed by LC-MS ( $M^{+2} = 1033$ ).<sup>3</sup>

The solution of conjugate **13** was dialysed (sodium phosphate, 50 mM, pH 8) (Slide-A-Lyzer<sup>®</sup>, 2,000 MWCO, Thermo Scientific) for 12 h at 4°C and subsequently heated at 37°C for 24 h. Analysis by LC-MS showed that conjugate **14** had been formed ( $M^{+2} = 1042$ ).

2-Mercaptoethanol (100 mol eq.) was added and the reaction was maintained at 37°C for 24 h. Analysis by LC-MS showed that the hydrolysed somatostatin / *N*-fluorescein dibromomaleimide adduct **14** was completely stable to these reaction conditions.

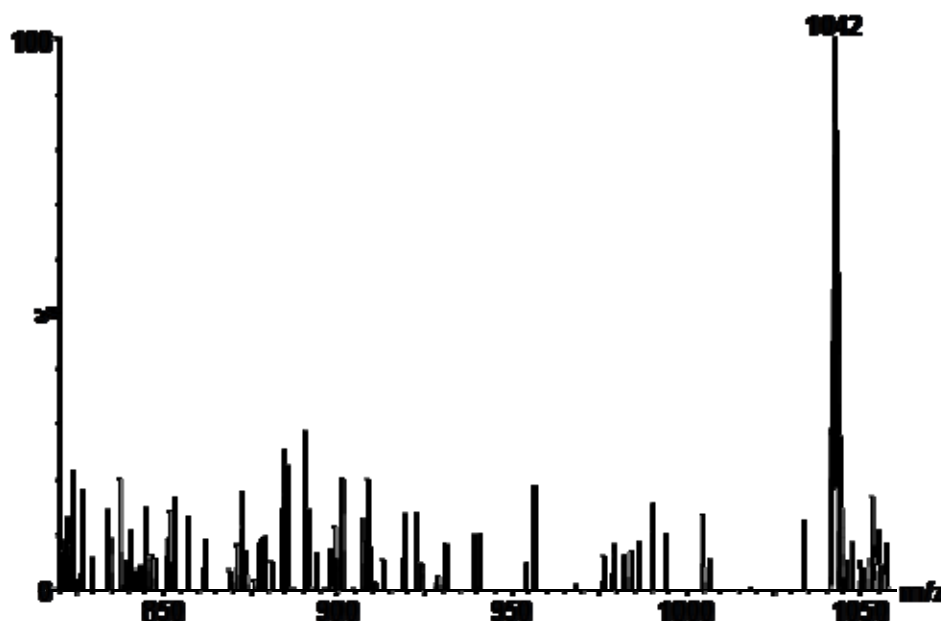

#### 4.20 Grb2-SH2 Domain L111C / *N*-Fluoresceindibromomaleimide Adduct

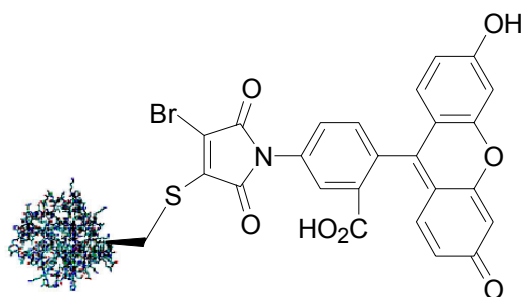

To a solution of model protein **1** (100  $\mu$ L, [Protein] 2.0 mg/mL, 20 mM MES, 150 mM NaCl, pH 6) at 0°C was added *N*-fluoresceindibromomaleimide (5  $\mu$ L, 2.82 mM solution in DMF). The mixture was vortexed for 1 s then maintained at 0°C for 2 h. Analysis using LC-MS showed that the desired product had been formed in >95% conversion (mass = 14681).

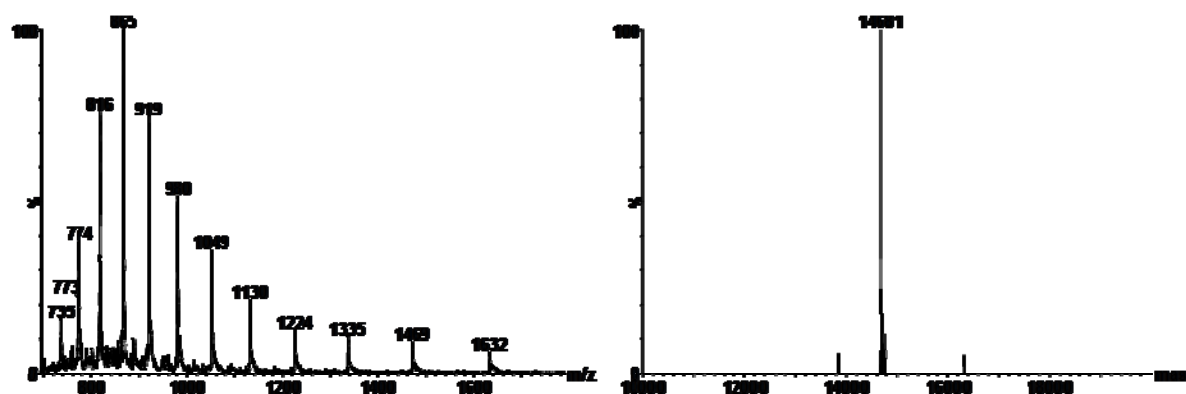

#### 4.21 Grb2-SH2 Domain L111C / *N*-Fluoresceindibromomaleimide / $\beta$ -1-thioglucose Adduct

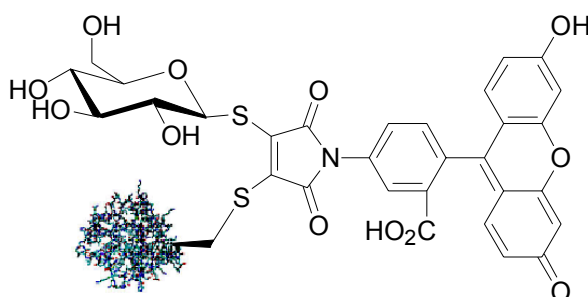

To a solution of model protein **1** (100  $\mu$ L, [Protein] 2.0 mg/mL, 20 mM MES, 150 mM NaCl, pH 6) at 0°C was added *N*-fluoresceindibromomaleimide (5  $\mu$ L, 2.82 mM solution in DMF). The mixture was vortexed for 1 s then maintained at 0°C for 2 h. Analysis using LC-MS showed that the protein / *N*-fluoresceindibromomaleimide adduct had been formed (mass = 14681).

The mixture was treated with  $\beta$ -1-thioglucose, sodium salt **8** (5  $\mu$ L, 2.82 mM solution in H<sub>2</sub>O) at 0°C. The mixture was vortexed for 1 s and maintained at 0°C for 1 h after which the mixture was analysed by LC-MS. Analysis showed that the protein / *N*-

fluoresceindibromomaleimide /  $\beta$ -1-thioglucose adduct was formed in >85% conversion (mass = 14797).

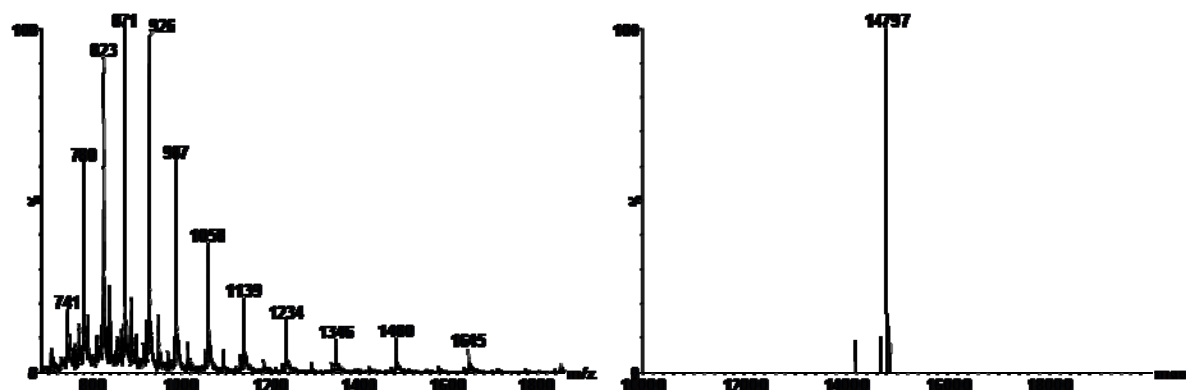

#### 4.22 2-Mercaptoethanol-mediated Cleavage of Grb2-SH2 Domain L111C / *N*-fluoresceindibromomaleimide / $\beta$ -1-thioglucose Adduct to Yield Protein 1

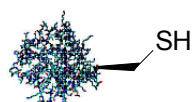

To a solution of model protein **1** (100  $\mu$ L, [Protein] 2.0 mg/mL, 20 mM MES, 150 mM NaCl, pH 6) at 0°C was added *N*-fluoresceindibromomaleimide (5  $\mu$ L, 2.82 mM solution in DMF). The mixture was vortexed for 1 s then maintained at 0°C for 2 h. Analysis using LC-MS showed that the protein / *N*-fluoresceindibromomaleimide adduct had been formed (mass = 14681).

The mixture was treated with  $\beta$ -1-thioglucose, sodium salt **8** (5  $\mu$ L, 2.82 mM solution in H<sub>2</sub>O) at 0°C. The mixture was vortexed for 1 s and maintained at 0°C for 1 h after which the mixture was analysed by LC-MS. Analysis showed that the protein / *N*-fluoresceindibromomaleimide /  $\beta$ -1-thioglucose adduct was formed (mass = 14797).

The mixture was treated with 2-mercaptoethanol (5  $\mu$ L, 282 mM solution in H<sub>2</sub>O) at 0°C. The mixture was vortexed for 1 s and maintained at 0°C for 2 h after which the mixture was analysed by LC-MS. Analysis showed that the protein / *N*-fluoresceindibromomaleimide /  $\beta$ -1-thioglucose adduct had been cleanly cleaved yielding the Grb2-SH2 (L111C) **1** in quantitative conversion (mass = 14181).

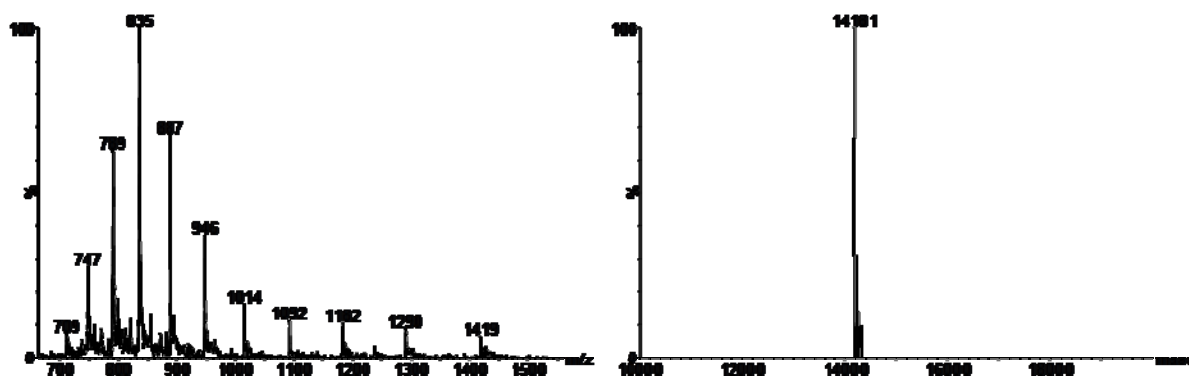

#### 4.23 Hydrolysed Grb2-SH2 Domain L111C / *N*-Fluorescein Dibromomaleimide / $\beta$ -1-Thioglucose Adduct **15**

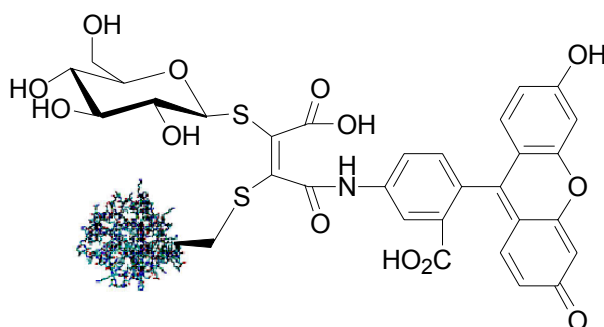

To a solution of model protein **1** (100  $\mu$ L, [Protein] 2.0 mg/mL, 20 mM MES, 150 mM NaCl, pH 6) at 0°C was added *N*-fluoresceindibromomaleimide (5  $\mu$ L, 2.82 mM solution in DMF). The mixture was vortexed for 1 s then maintained at 0°C for 2 h. Analysis using LC-MS showed that the protein / *N*-fluoresceindibromomaleimide adduct had been formed (mass = 14681).

The mixture was treated with  $\beta$ -1-thioglucose, sodium salt **8** (5  $\mu$ L, 2.82 mM solution in H<sub>2</sub>O) at 0°C. The mixture was vortexed for 1 s and maintained at 0°C for 1 h after which the mixture was analysed by LC-MS. Analysis showed that the protein / *N*-fluoresceindibromomaleimide /  $\beta$ -1-thioglucose adduct was formed (mass = 14797). Dialysis (100 mM sodium phosphate, 150 mM NaCl, pH 8.0, 1L) (Slide-A-Lyzer<sup>®</sup>, 10,000 MWCO, Thermo Scientific) for 12 h at 4°C gave product **15** in >95% conversion (mass = 14814).

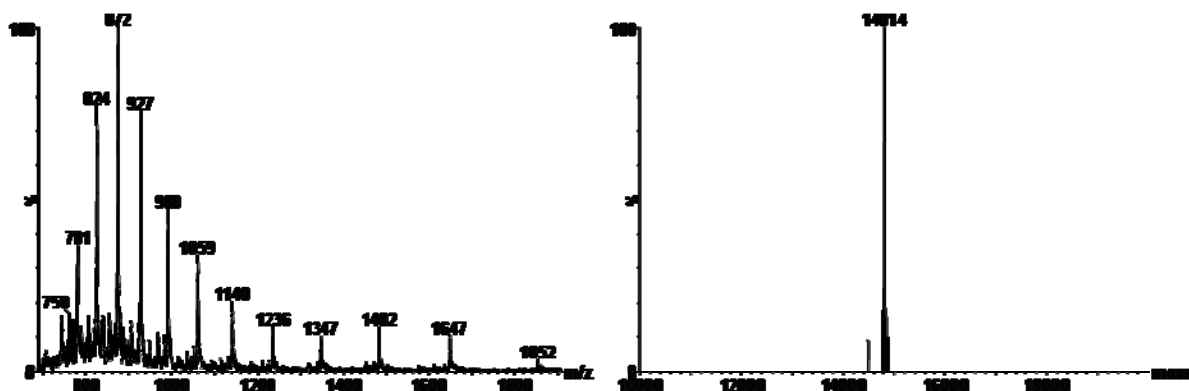

#### 4.24 Treatment of Hydrolysed Grb2-SH2 Domain L111C / N-Fluorescein Dibromomaleimide / $\beta$ -1-Thioglucose Adduct **15** with an excess of 2-Mercaptoethanol

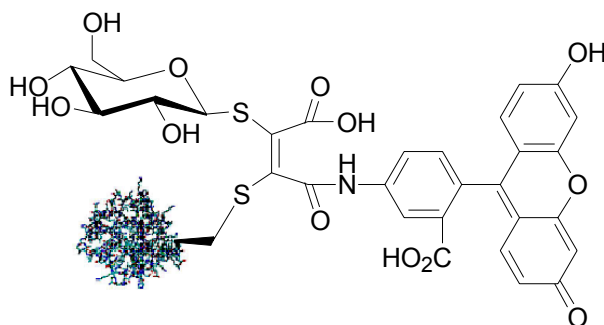

To a solution of model protein **1** (100  $\mu$ L, [Protein] 2.0 mg/mL, 20 mM MES, 150 mM NaCl, pH 6) at 0°C was added *N*-fluoresceindibromomaleimide (5  $\mu$ L, 2.82 mM solution in DMF). The mixture was vortexed for 1 s then maintained at 0°C for 2 h. Analysis using LC-MS showed that the protein / *N*-fluoresceindibromomaleimide adduct had been formed (mass = 14681).

The mixture was treated with  $\beta$ -1-thioglucose, sodium salt **8** (5  $\mu$ L, 2.82 mM solution in H<sub>2</sub>O) at 0°C. The mixture was vortexed for 1 s and maintained at 0°C for 1 h after which the mixture was analysed by LC-MS. Analysis showed that the protein / *N*-fluoresceindibromomaleimide /  $\beta$ -1-thioglucose adduct was formed (mass = 14797).

Dialysis (100 mM sodium phosphate, 150 mM NaCl, pH 8.0, 1L) (Slide-A-Lyzer<sup>®</sup>, 10,000 MWCO, Thermo Scientific) for 12 h at 4°C gave product **15** (mass = 14814).

The mixture was treated with 2-mercaptoethanol (5  $\mu$ L, 282 mM solution in H<sub>2</sub>O) at 0°C. The mixture was vortexed for 1 s and maintained at 37°C for 4 h after which the mixture was analysed by LC-MS. Analysis showed that hydrolysed protein / *N*-fluoresceindibromomaleimide /  $\beta$ -1-thioglucose **15** adduct was stable to these conditions.

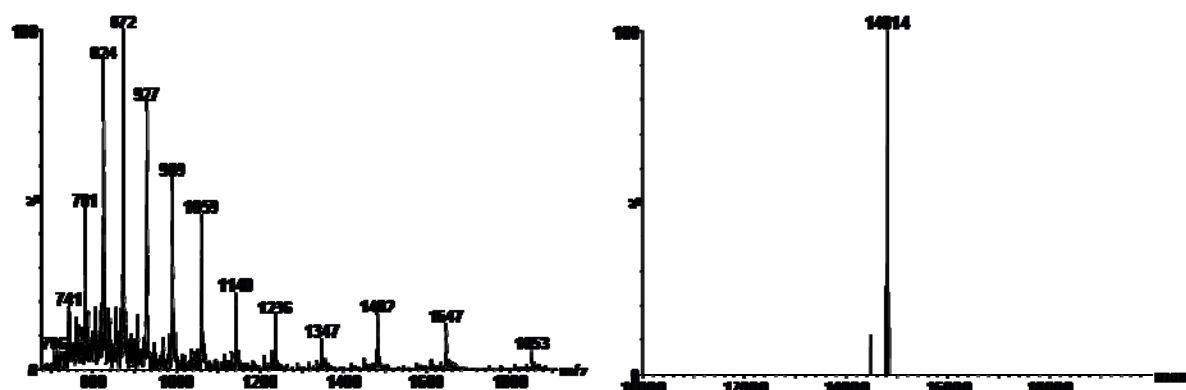

## References

1. Choi, D.-S.; Huang, S.; Huang, M.; Barnard, T. S.; Adams, R. D.; Seminario, J. M.; Tour, J. M., *J. Org. Chem.*, **1998**, 63, 2646-2655.
2. Dubernet, M.; Caubert, V.; Guillard, J.; Viaud-Massuard, M.-C., *Tetrahedron*, **2005**, 61, 4585-4593.
3. Smith, M. E. B.; Schumacher, F. F.; Ryan, C. P.; Tedaldi, L. M.; Papaioannou, D.; Waksman, G.; Caddick, S.; Baker, J. R. *J. Am. Chem. Soc.* **2010**, 132, 1960-1965.
4. Trester-Zedlitz, M.; Kamada, K.; Burley, S. K.; Fenyo, D; Chait, B. T.; Muir T. W. *J. Am. Chem. Soc.*, **2003**, 125, 2416-2415.
5. The plasmid encoding Grb2 SH2 domain (residues 53-163) was kindly provided by Dr. Stephen F Martin (University of Texas, A., TX).
6. Benfield, A. P.; Whiddon, B. B.; Clements, J. H.; Martin, S. F., *Arch. Biochem. Biophys.* **2007**, 462, 47-53.
7. McNemar, C.; Snow, M. E.; Windsor, W. T.; Prongay, A.; Mui, P.; Zhang, R. M.; Durkin, J.; Le, H. V.; Weber, P. C., *Biochemistry* **1997**, 36, 10006-10014.
